# Supplementary material
Source: Springer Nature journal article supplement (https://www.springermedizin.de/resource/supplementary/13075_2005_1829_MOESM4_ESM.pdf/9690676)

**Fig 4**

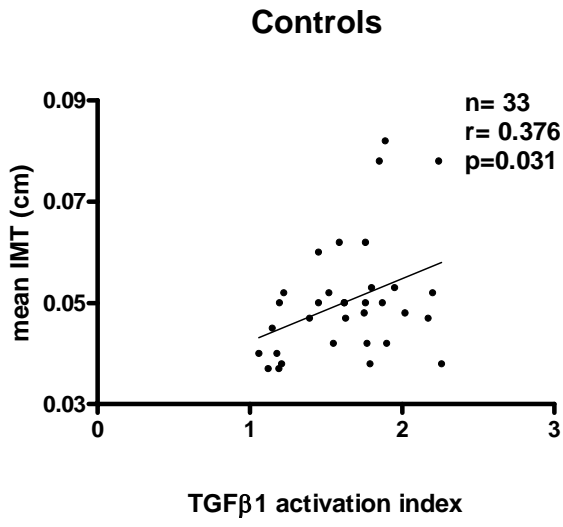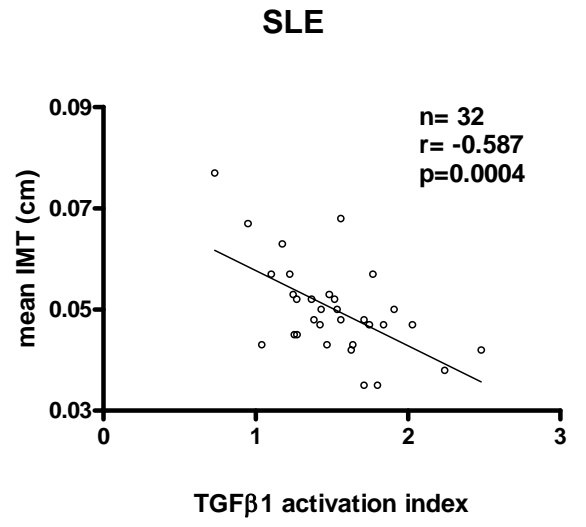

Supplement: MOESM4 [file 9690676]
